# Supplementary material
Source: MDPI journal article supplement (https://www.mdpi.com/2075-5309/13/7/1854)
Supplement: s1 [file s1]

## Article

# Composite Cements Using Ground Granulated Blast Furnace Slag, Fly Ash, and Geothermal Silica with Alkali Activation

Andres Salas Montoya <sup>1</sup>, Loth I. Rodríguez-Barboza <sup>2,\*</sup>, Fabiola Colmenero Fonseca <sup>3</sup>, Javier Cárcel-Carrasco <sup>3</sup> and Lauren Y. Gómez-Zamorano <sup>2,\*</sup>

<sup>1</sup> Departamento de Ingeniería Civil, Facultad de Ingeniería y Arquitectura, Universidad Nacional de Colombia, Manizales 170003, Colombia; asalasmo@unal.edu.co.

<sup>2</sup> Programa Doctoral en Ingeniería de Materiales, Facultad de Ingeniería Mecánica y Eléctrica, Universidad Autónoma de Nuevo León, Ave. Universidad s/n, Ciudad Universitaria, San Nicolás de los Garza 66455, Nuevo León, Mexico

<sup>3</sup> Instituto de Tecnología de Materiales, Universitat Politècnica de València, 46022 Valencia, Spain; fcolfon@upvnet.upv.es (F.C.F.); fracarcl@csa.upv.es (J.C.-C.)

\* Correspondence: ivonnerodriguez.lirb@gmail.com (L.I.R.-B.); lauren.gomezzm@uanl.edu.mx (L.Y.G.-Z.)

**Table S1.** Compressive strength results activated with 4% of Na<sub>2</sub>Oeq, compared to OPC.

| Sample                  | Activator                        | Compressive Strength (MPa) |      |      |       |       |
|-------------------------|----------------------------------|----------------------------|------|------|-------|-------|
|                         |                                  | 3                          | 7    | 14   | 28    | 90    |
| OPC 100%                |                                  | 20.1                       | 24.4 | 34.6 | 36.8  | 37.17 |
| 50OPC-50GGBFS           |                                  | 7.2                        | 16.2 | 21.1 | 23.1  | 30.03 |
| 50OPC-40GGBFS-5FA-5GS   |                                  | 8.8                        | 16.5 | 22.9 | 24.5  | 32.54 |
| 50OPC-35GGBFS-10FA-5GS  | Na <sub>2</sub> SiO <sub>3</sub> | 6.9                        | 16.4 | 23   | 21.3  | 32.27 |
| 50OPC-30GGBFS-10FA-10GS |                                  | 9.1                        | 19.1 | 27.4 | 29.3  | 35.6  |
| 50OPC-25GGBFS-15FA-10GS |                                  | 9.5                        | 20.5 | 25.4 | 28.6  | 33.61 |
| 50OPC-50GGBFS           |                                  | 10.1                       | 14.1 | 16.5 | 19.1  | 22.95 |
| 50OPC-40GGBFS-5FA-5GS   |                                  | 10.2                       | 12.6 | 14.9 | 19.1  | 22.82 |
| 50OPC-35GGBFS-10FA-5GS  | NaOH                             | 6.6                        | 12.8 | 15.6 | 17.7  | 21.36 |
| 50OPC-30GGBFS-10FA-10GS |                                  | 7.8                        | 12   | 14.5 | 17.5  | 23.31 |
| 50OPC-25GGBFS-15FA-10GS |                                  | 13                         | 11.4 | 14.6 | 16.35 | 19.92 |
| 50OPC-40GGBFS-5FA-5GS   |                                  | 16.1                       | 27.2 | 32   | 39.25 | -     |
| 50OPC-30GGBFS-10FA-10GS | Na <sub>2</sub> SO <sub>4</sub>  | 13.1                       | 23.6 | 29   | 35.19 | -     |
| 50OPC-25GGBFS-15FA-10GS |                                  | 12.3                       | 22.1 | 27.1 | 34.31 | -     |

**Table S2.** Compressive strength results activated with 4% of Na<sub>2</sub>Oeq, compared to OPC.

| Sample                  | Activator                        | Compressive Strength (MPa) |       |      |       |       |
|-------------------------|----------------------------------|----------------------------|-------|------|-------|-------|
|                         |                                  | 3                          | 7     | 14   | 28    | 90    |
| OPC 100%                | Na <sub>2</sub> SiO <sub>3</sub> | 20.1                       | 24.4  | 34.6 | 36.8  | 37.17 |
| 50OPC-50GGBFS           |                                  | 5.4                        | 8.9   | 13.5 | 20    | 26.24 |
| 50OPC-35GGBFS-10FA-5GS  |                                  | 6.2                        | 11.4  | 17.7 | 22.8  | 29.58 |
| 50OPC-40GGBFS-5FA-5GS   |                                  | 6.6                        | 11.8  | 18.4 | 21.3  | 29.54 |
| 50OPC-25GGBFS-15FA-10GS |                                  | 7.4                        | 14.2  | 20.9 | 21.9  | 25.49 |
| 50OPC-30GGBFS-10FA-10GS |                                  | 4                          | 9.4   | 13.4 | 15.6  | 21.06 |
| 50OPC-50GGBFS           | NaOH                             | 10.7                       | 13.6  | 14.9 | 18.2  | 21.72 |
| 50OPC-35GGBFS-10FA-5GS  |                                  | 9.3                        | 10.8  | 13.1 | 15.3  | 15.77 |
| 50OPC-40GGBFS-5FA-5GS   |                                  | 11.2                       | 12.8  | 15.9 | 16.4  | 24.42 |
| 50OPC-25GGBFS-15FA-10GS |                                  | 9.4                        | 11.2  | 15.9 | 16.5  | 20.58 |
| 50OPC-30GGBFS-10FA-10GS |                                  | 10.5                       | 13.5  | 16.1 | 14.6  | 19.14 |
| 70OPC-20GGBFS-0FA-10GS  |                                  | 25.4                       | 31.7  | 34.2 | 40.65 | -     |
| 70OPC-10GGBFS-10FA-10GS |                                  | 25.21                      | 29.12 | 35   | 39.65 | -     |
| 70OPC-30GGBFS           |                                  | 18.6                       | 21.8  | 24.8 | 30.6  | -     |
